# Supplementary material
Source: publisher figshare collection journal article supplement (https://tandf.figshare.com/ndownloader/files/24422301)
Supplement: Supplementary file 1 [file 24422301]

a


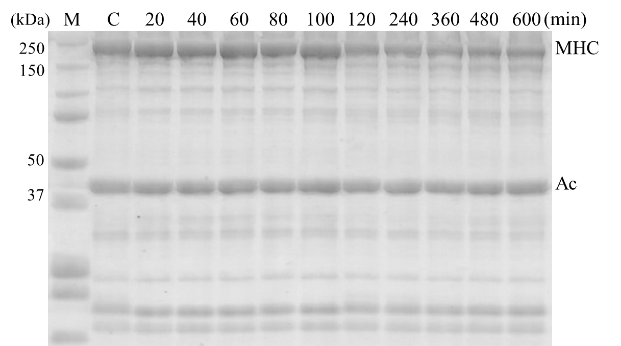


b


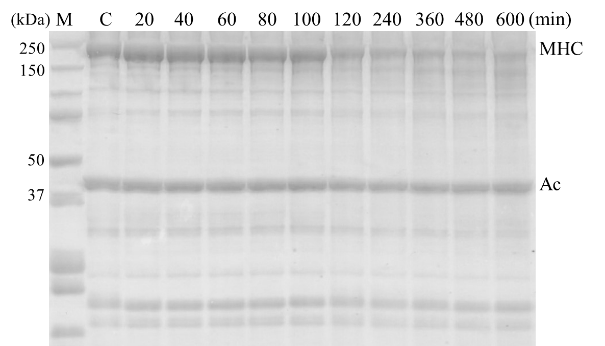


c


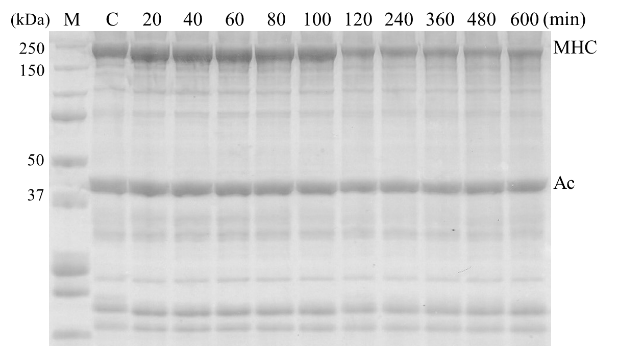


d


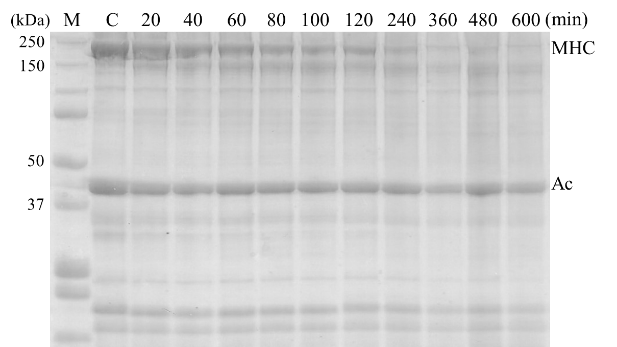


e


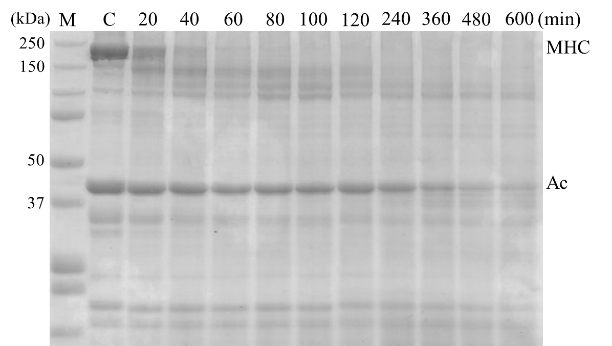


f


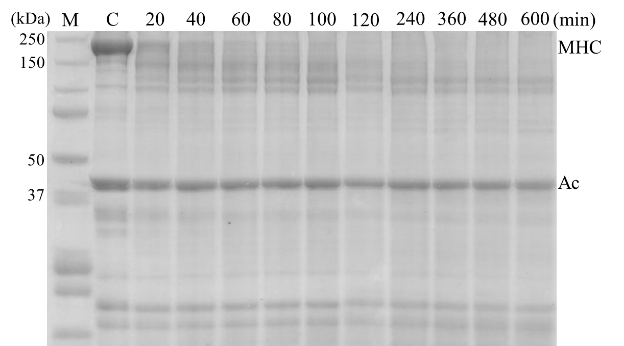


Supplement Data-1 SDS-PAGE pattern of Alaska pollock at Modori heating

a: 40oC of SA grade b: 50oC of SA grade c: 60oC of SA grade

d: 40oC of RA grade e: 50oC of RA grade f: 60oC of RAgrade

M: molecular weight marker MHC: myosin heavy chain Ac: actin

a


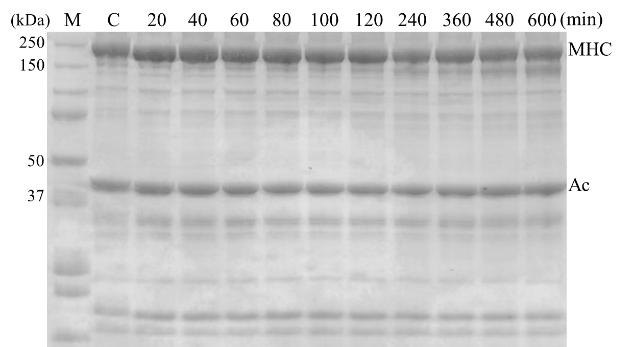


b


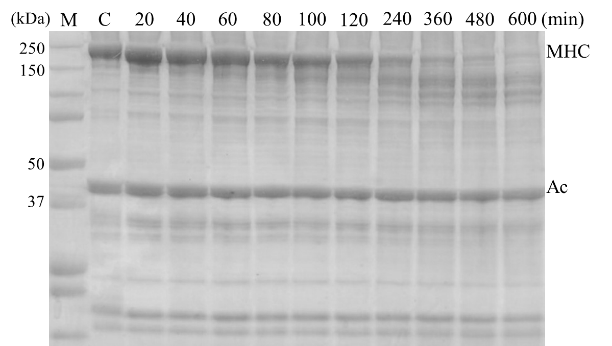


c


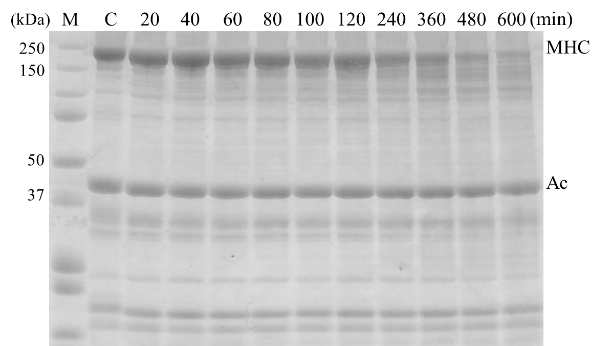


d


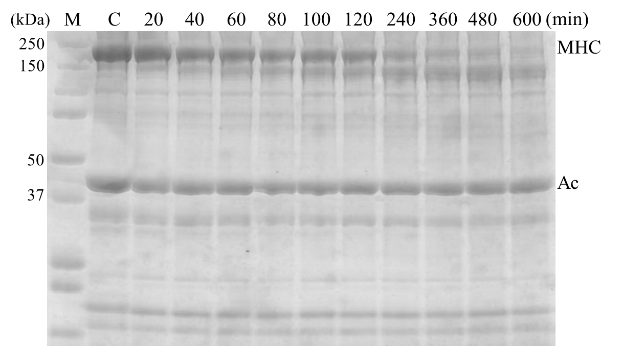


e


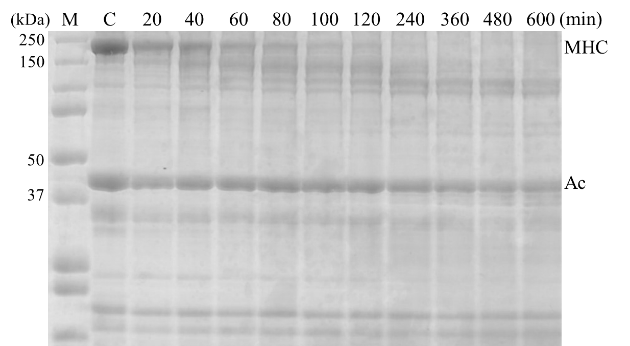


f


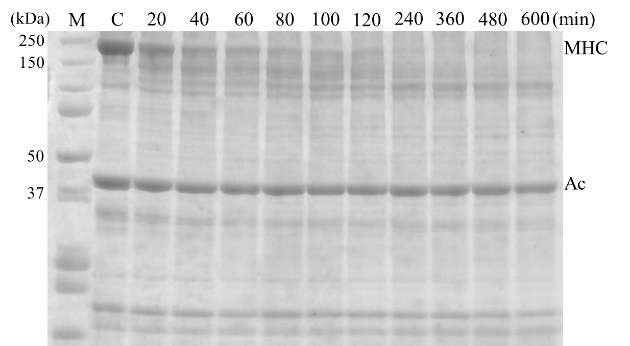


Supplement Data-2 SDS-PAGE of Alaska pollock with E-64 at Modori heating

a: 40oC of SA grade b: 50oC of SA grade c: 60oC of SA grade

d: 40oC of RA grade e: 50oC of RA grade f: 60oC of RA grade

M: molecular weight marker MHC: myosin heavy chain Ac: actin

a


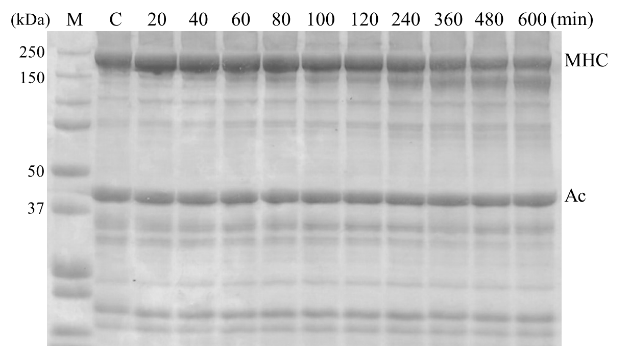


b


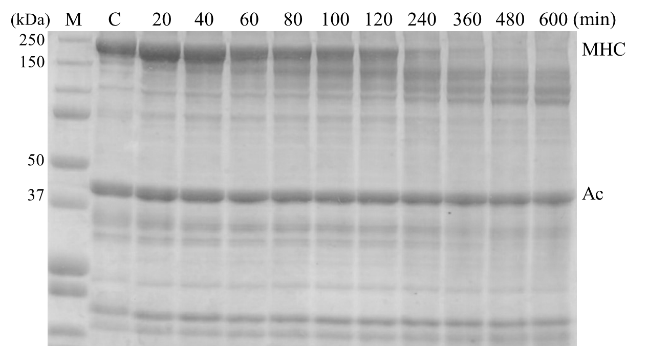


c


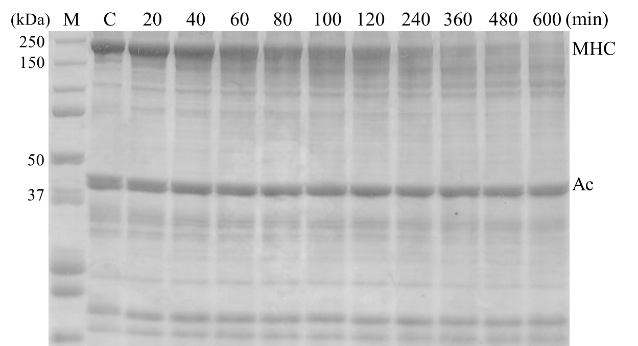


d


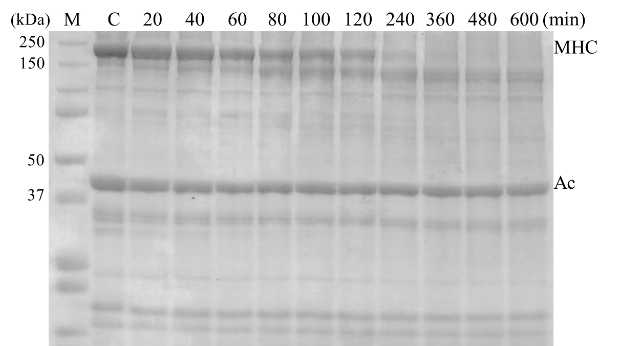


e


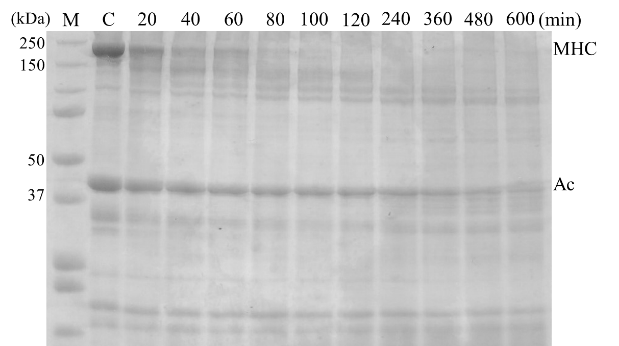


f


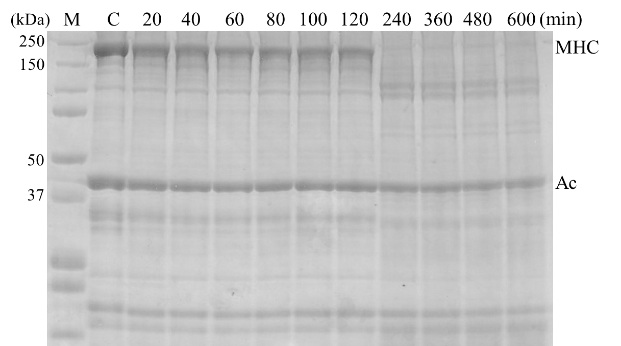


Supplement Data-3 SDS-PAGE pattern of Alaska pollock with EDTA at Modori heating

a: 40oC of SA grade b: 50oC of SA grade c: 60oC of SA grade

d: 40oC of RA grade e: 50oC of RA grade f: 60oC of RA grade

M: molecular weight marker MHC: myosin heavy chain Ac: actin

a


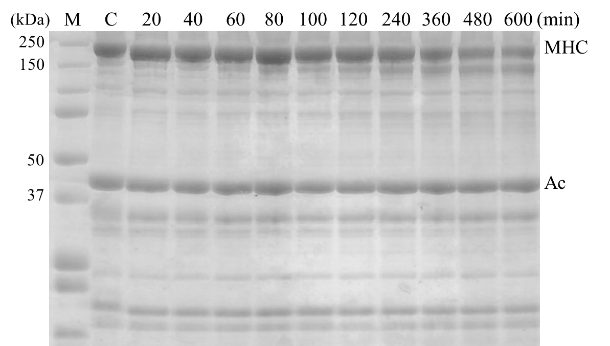


b


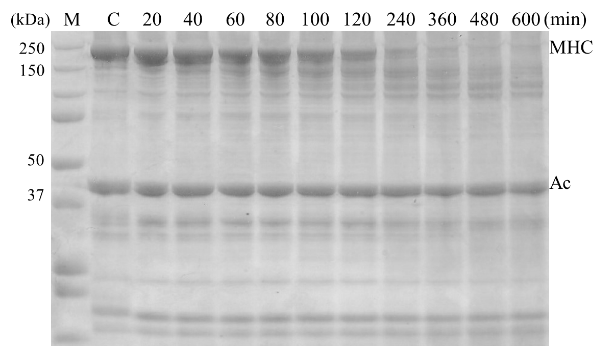


c


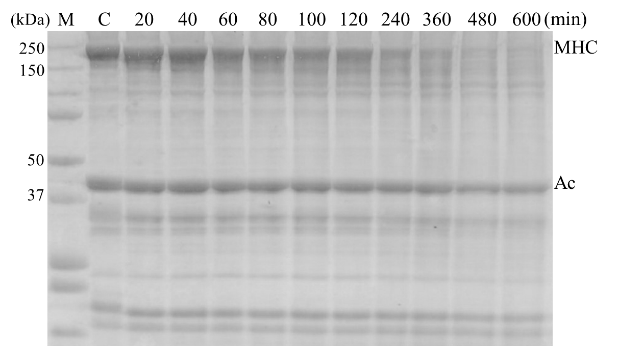


d


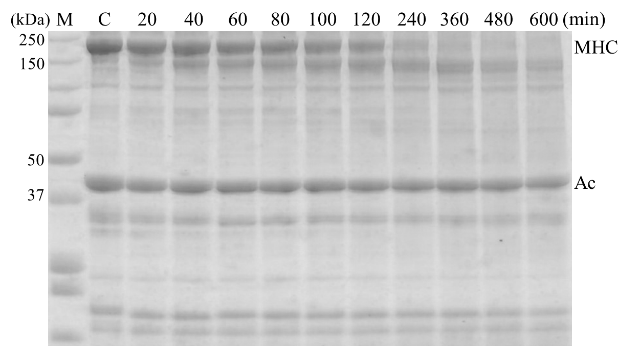


e


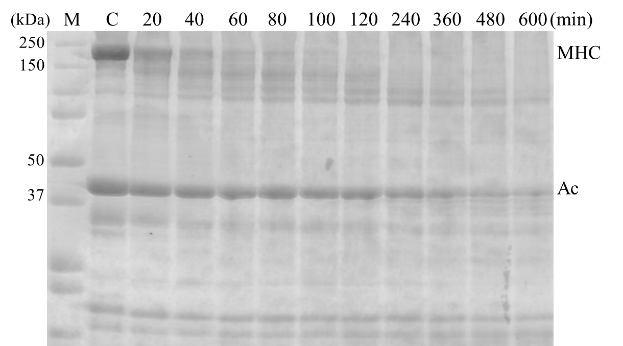


f


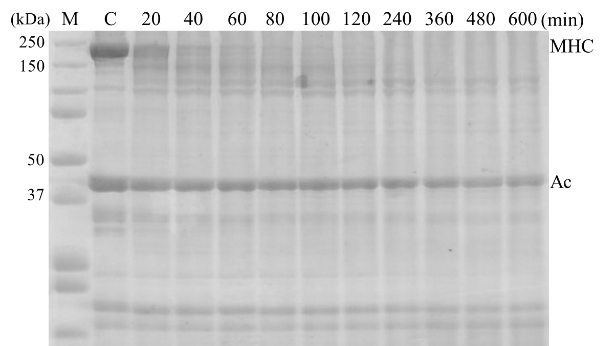


Supplement Data-4 SDS-PAGE pattern of Alaska pollock with phenanthrolin at Modori heating

a: 40oC of SA grade b: 50oC of SA grade c: 60oC of SA grade

d: 40oC of RA grade e: 50oC of RA grade f: 60oC of RA grade

M: molecular weight marker MHC: myosin heavy chain Ac: actin

a


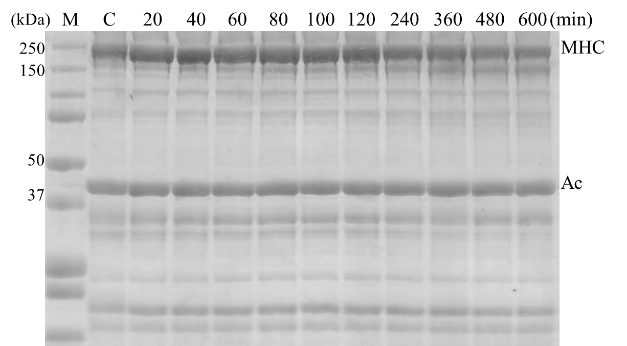


b


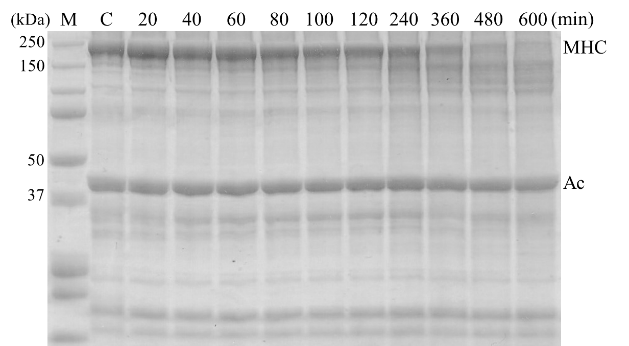


c


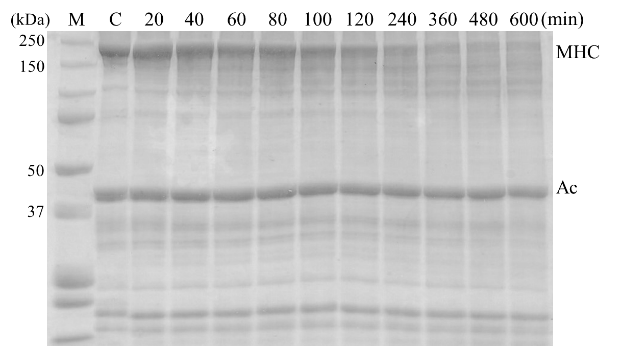


d


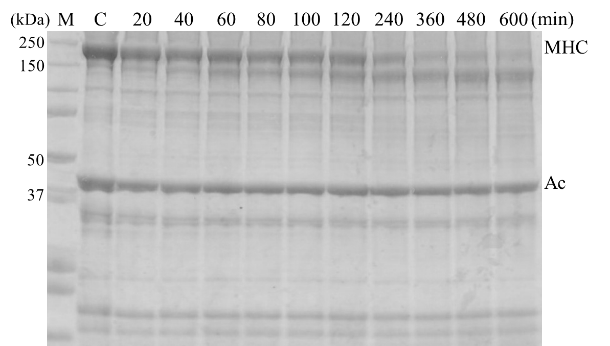


e


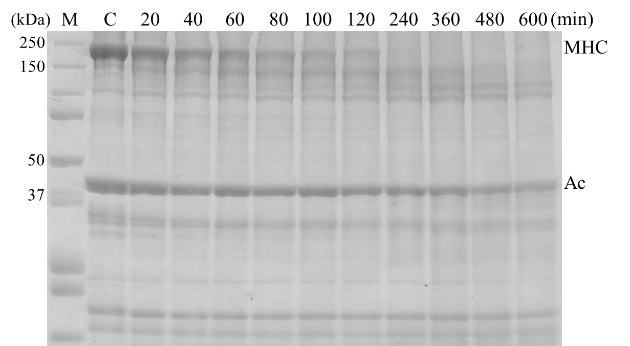


f


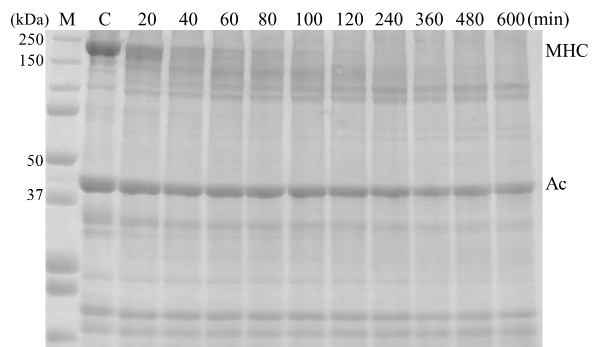


Supplement Data-5 SDS-PAGE pattern of Alaska pollock with aprotinin at Modori heating

a: 40oC of SA grade b: 50oC of SA grade c: 60oC of SA grade

d: 40oC of RA grade e: 50oC of RA grade f: 60oC of RA grade

M: molecular weight marker MHC: myosin heavy chain Ac: actin

a


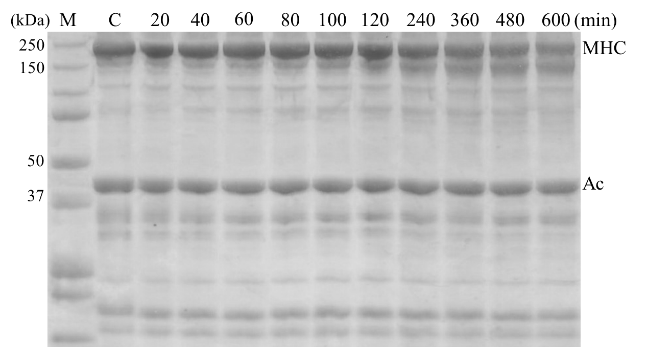


b


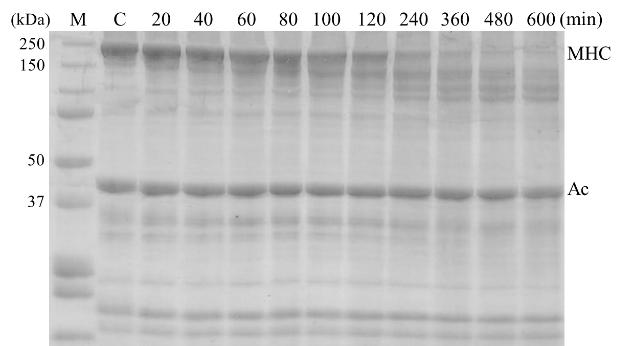


c


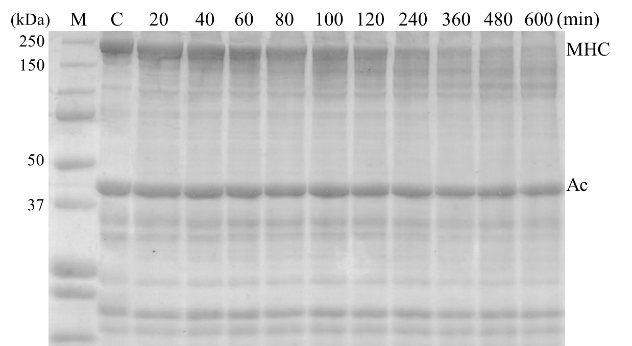


d


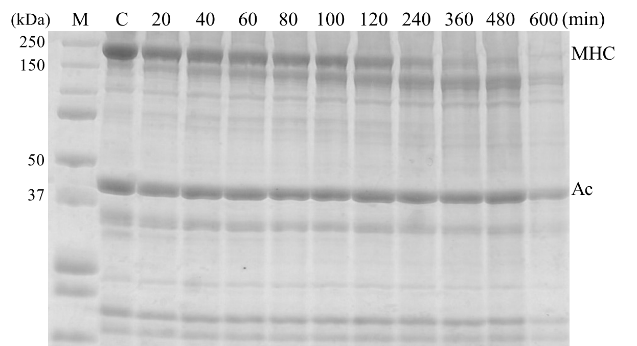


e


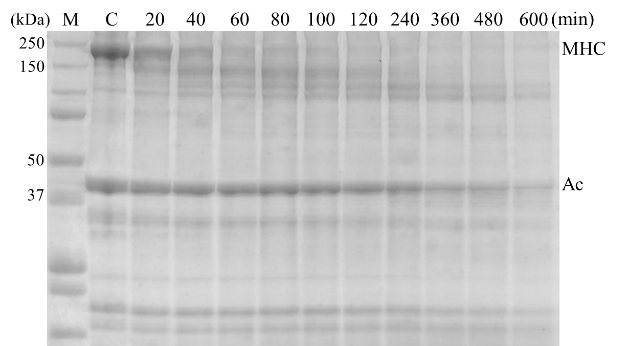


f


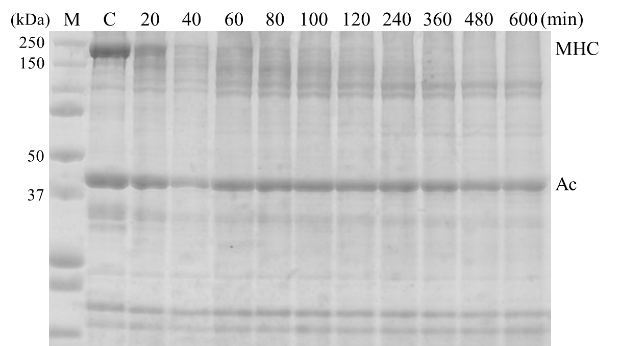


Supplement Data-6 SDS-PAGE pattern of Alaska pollock with PMSF at Modori heating

a: 40oC of SA grade b: 50oC of SA grade c: 60oC of SA grade

d: 40oC of RA grade e: 50oC of RA grade f: 60oC of RA grade

M: molecular weight marker MHC: myosin heavy chain Ac: actin

a


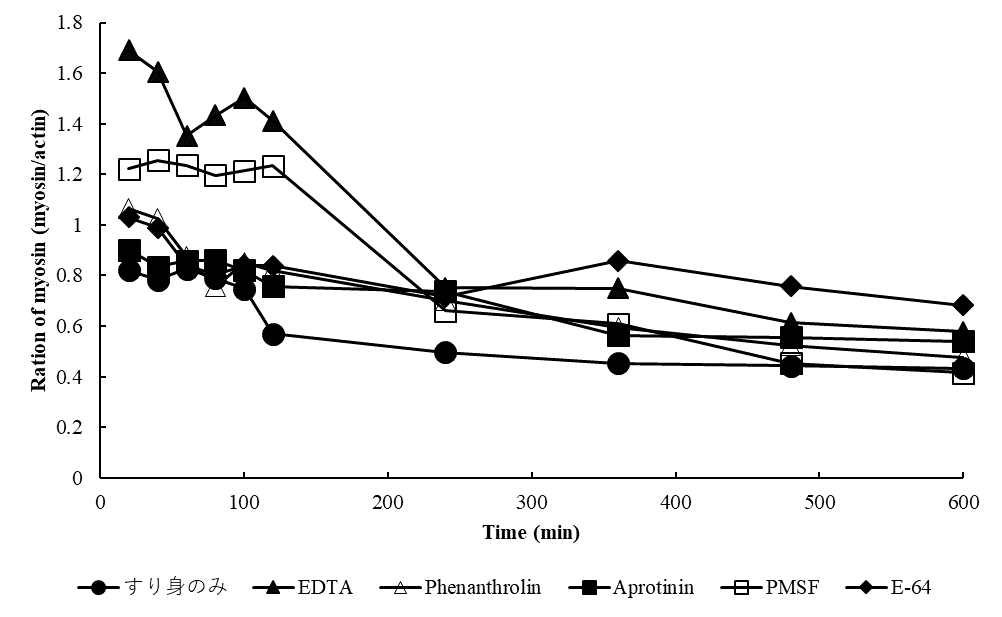


b


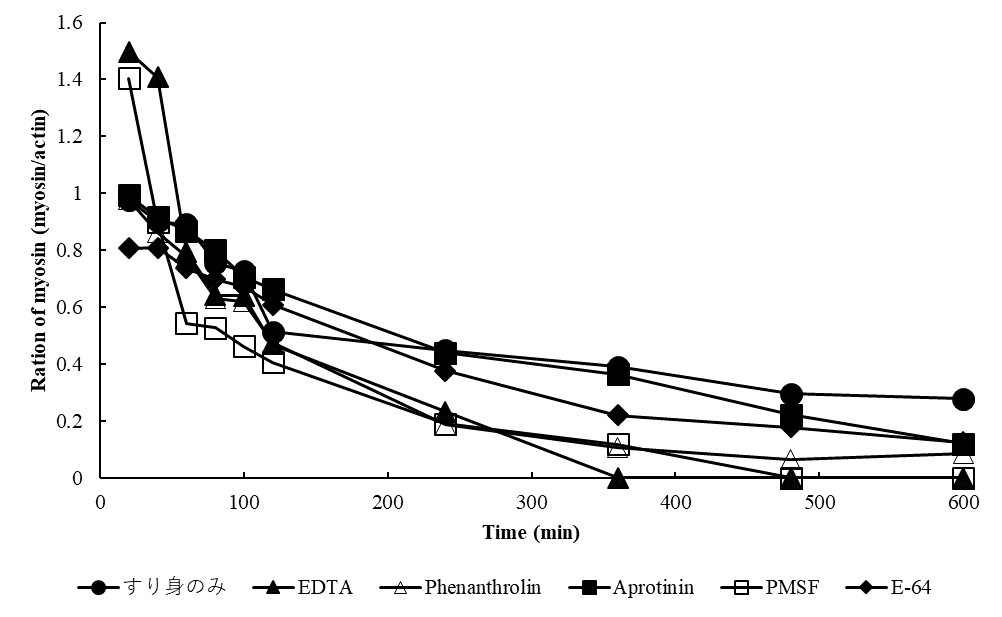


c


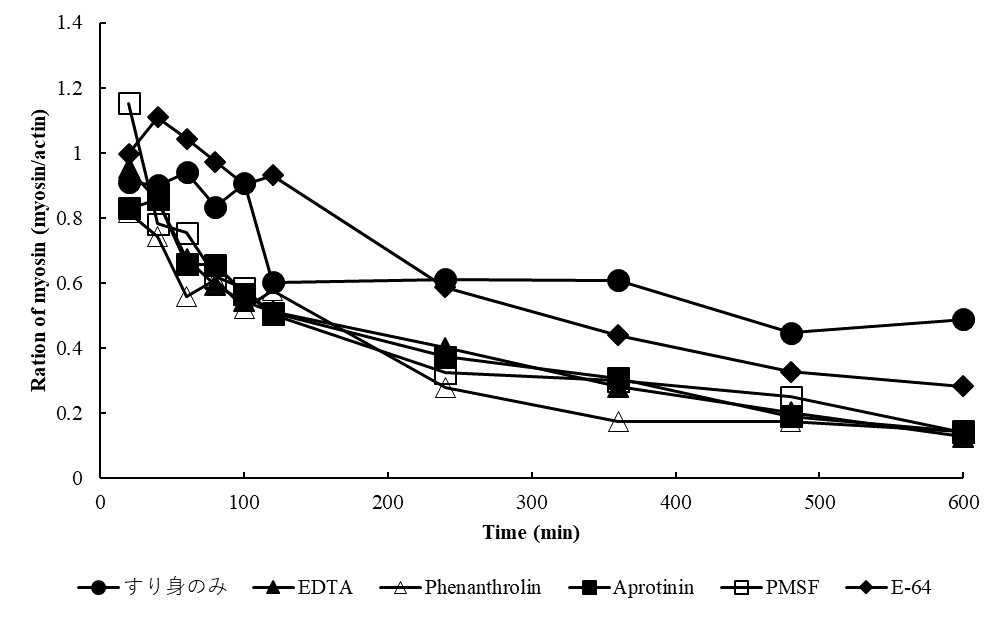


d


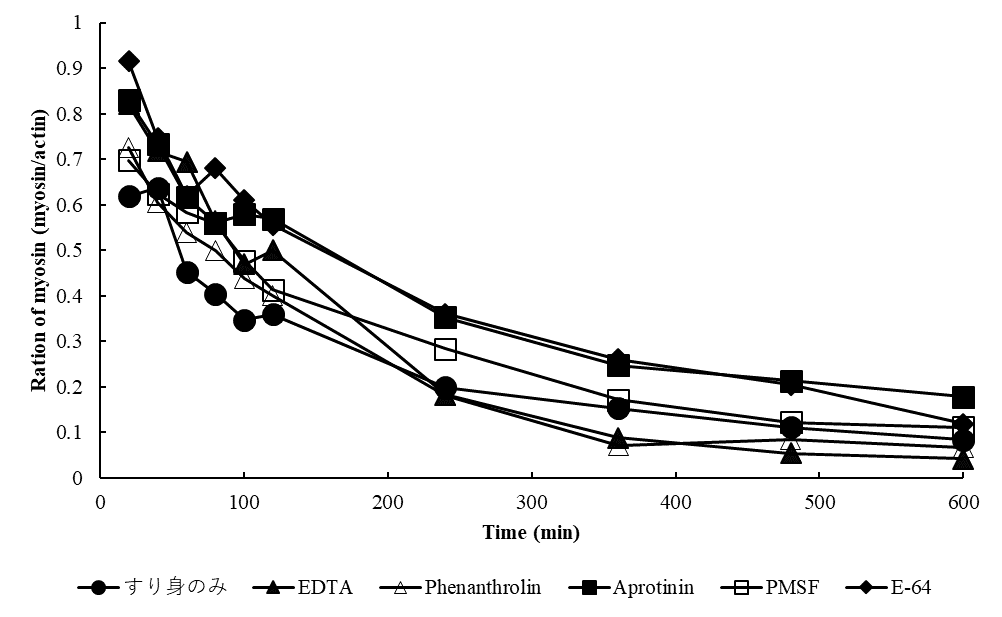


e


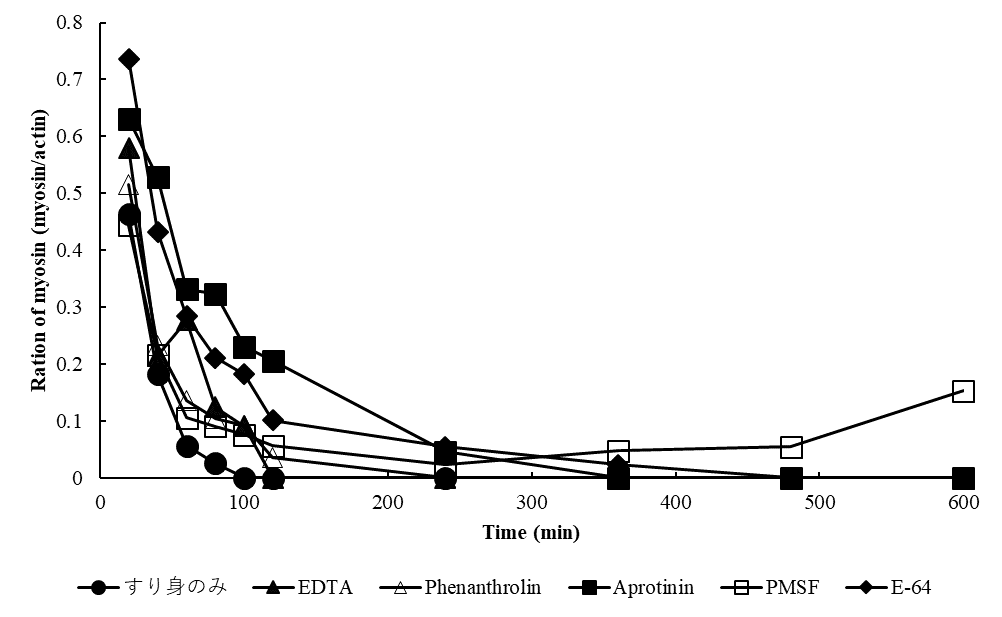


f


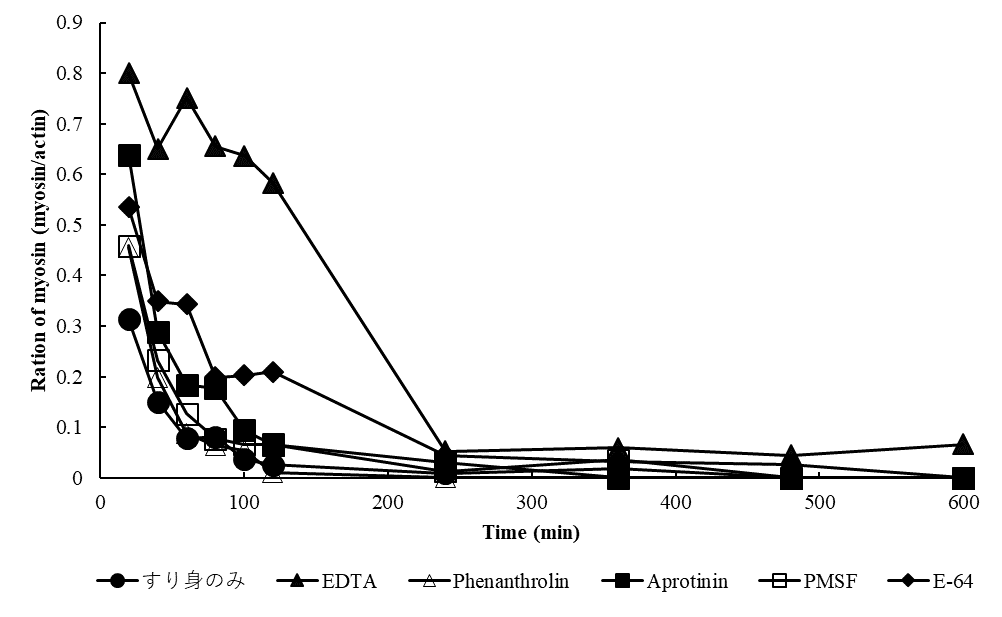


Supplement Data-7 Ration of myosin of Alaska pollock

a: 40oC of SA grade b: 50oC of SA grade c: 60oC of SA grade

d: 40oC of RA grade e: 50oC of RA grade f: 60oC of RA grade

●: non-added ◆: E-64 ▲: EDTA △: Phenanthroline

■: Aprotinin □: PMSF
